# Supplementary material for: Identification of errors in draft genome assemblies at single-nucleotide resolution for quality assessment and improvement
Source: PubMed Central journal article supplement (PMC10582259; doi:10.1038/s41467-023-42336-w), 2023-10-17
Supplement: 41467_2023_42336_MOESM4_ESM.pdf [file 41467_2023_42336_MOESM4_ESM.pdf]

## **Description of Additional Supplementary Files**

### Supplementary Data 1

Description: Public datasets used for assembly quality assessment

### Supplementary Data 2

Description: Introduced heterozygous variants and errors in the simulated hg38 assemblies

### Supplementary Data 3

Description: Comparison of CRAQ output and simulated errors in the simulated hg38\_sim2

### Supplementary Data 4

Description: Simulated errors missed by CRAQ (false negatives)

### Supplementary Data 5

Description: Potential error locus in the HiCanu assembly of *D. melanogaster* hybrid F1

### Supplementary Data 6

Description: CREs and CSEs identified in the Canu assembly of *S. pennellii*

### Supplementary Data 7

Description: SyRI SV statistics for the Canu assembly of *S. pennellii*

### Supplementary Data 8

Description: Statistics for CSE breakages and overlaps with BioNano conflicts in *A. oxysepala*

### Supplementary Data 9

Description: Bionano conflicts in *A. oxysepala* and overlaps with CSEs

### Supplementary Data 10

Description: Comparison of quality evaluation for *A. oxysepala* before and after CRAQ correction
